# Supplementary material for: Mapping the future afforestation distribution of China constrained by a national afforestation plan and climate change
Source: Copernicus journal article supplement (doi:10.5194/bg-21-2839-2024), 2024-06-13
Supplement: Supplementary file 1 [file bg-21-2839-2024-supplement.pdf]

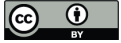

*Supplement of*

## **Mapping the future afforestation distribution of China constrained by a national afforestation plan and climate change**

**Shuaifeng Song et al.**

*Correspondence to:* Xuezhen Zhang (xzzhang@igsrr.ac.cn) and Xiaodong Yan (yxd@bnu.edu.cn)

The copyright of individual parts of the supplement might differ from the article licence.

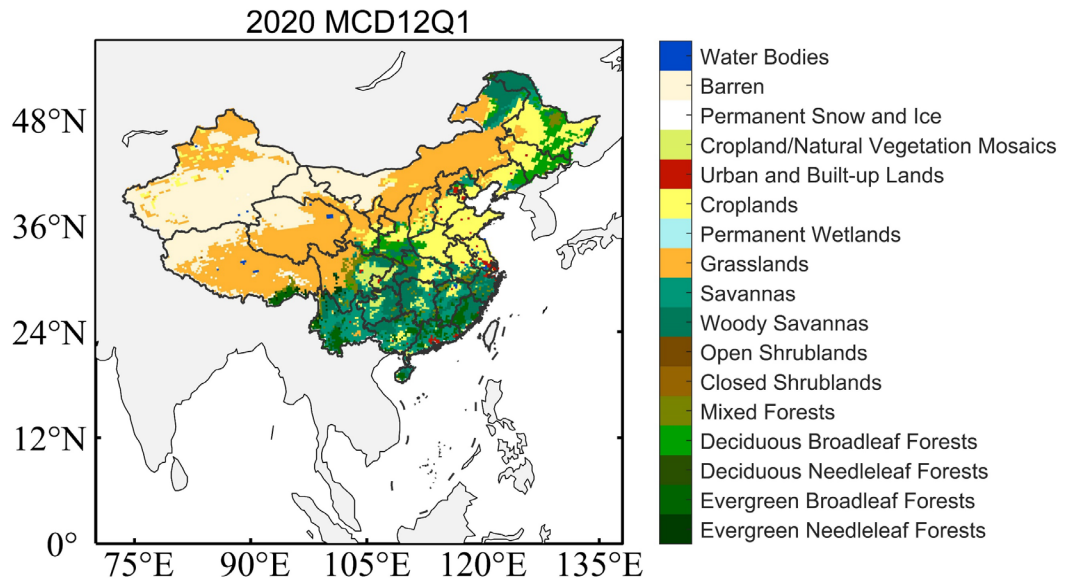

**Figure S1:** Spatial distribution of land use and cover types in 2020 based on the MCD12Q1 data.

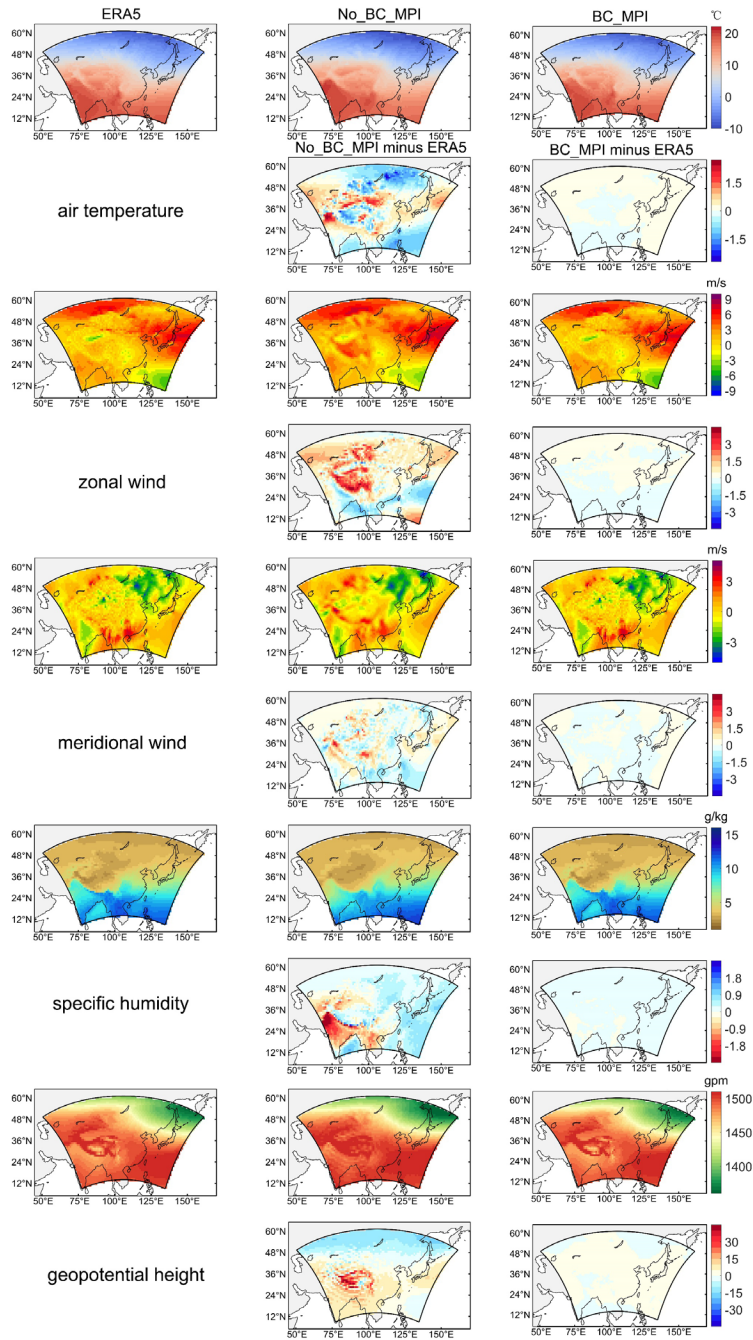

**Figure S2:** Comparison of ERA5 reanalysis data with raw (No\_BC\_MPI) and bias-corrected historical MPI-ESM1-2-HR model (BC\_MPI) at the pressure of 850 hPa for the period 1995–2014. The odd rows represent the spatial distribution of climatology, and the even rows represent the differences.

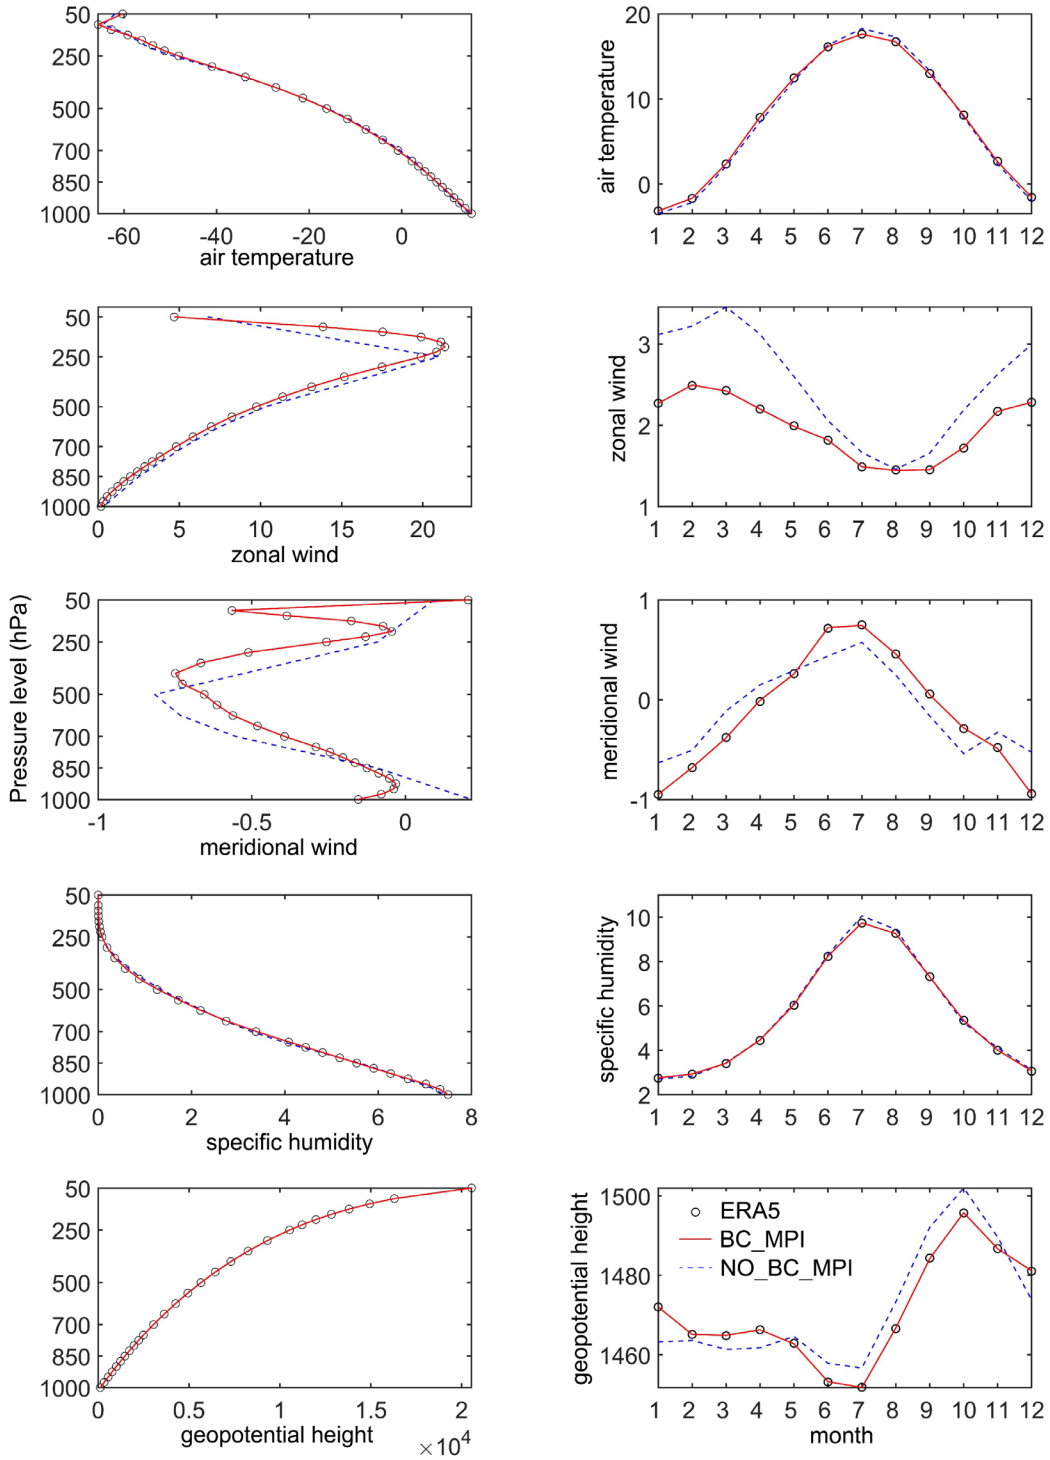

**Figure S3:** Comparison of ERA5 reanalysis data with raw (No\_BC\_MPI) and bias-corrected historical MPI-ESM1-2-HR model (BC\_MPI) at the different pressure levels and months.



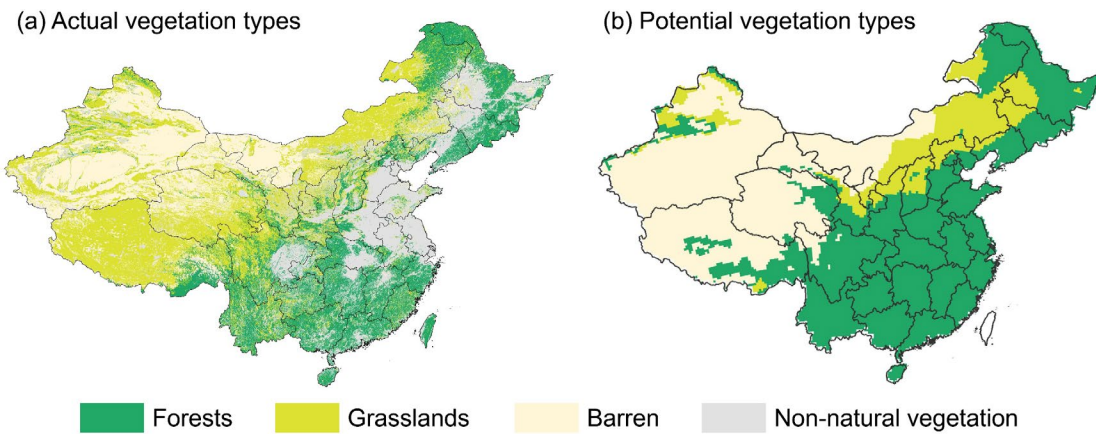

**Figure S4:** Comparison of actual (a) and potential (b) nature vegetation types. The actual vegetation in the year 2005 refers to China’s Land-Use/cover Datasets (CLUDs), which has a spatial resolution of 1- by 1 km and covers the entire China (Liu et al., 2014). The potential vegetation types derived from the HLZ model are based on the average of 1995-2014.

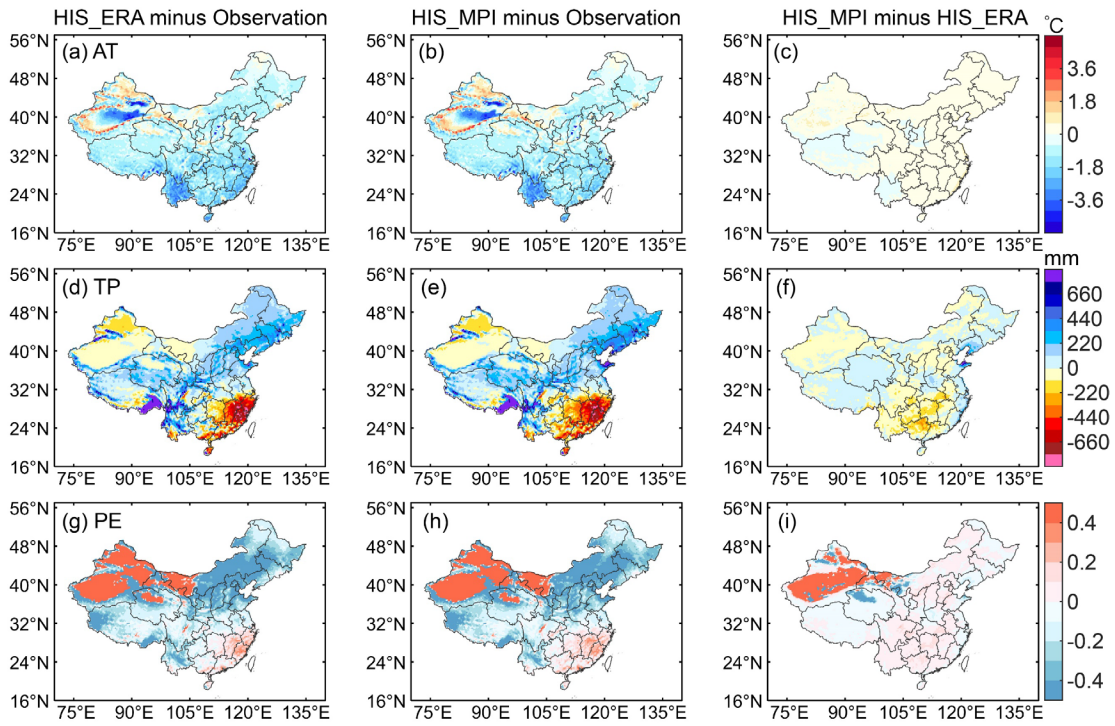

**Figure S5:** Differences between simulated and observed climatological mean of the AT, TP, and PE in China during the historical periods (1995-2014). HIS\_MPI and HIS\_ERA indicate the LBCs driving the WRF model from the MPI-ESM1-2-HR model and ERA5.

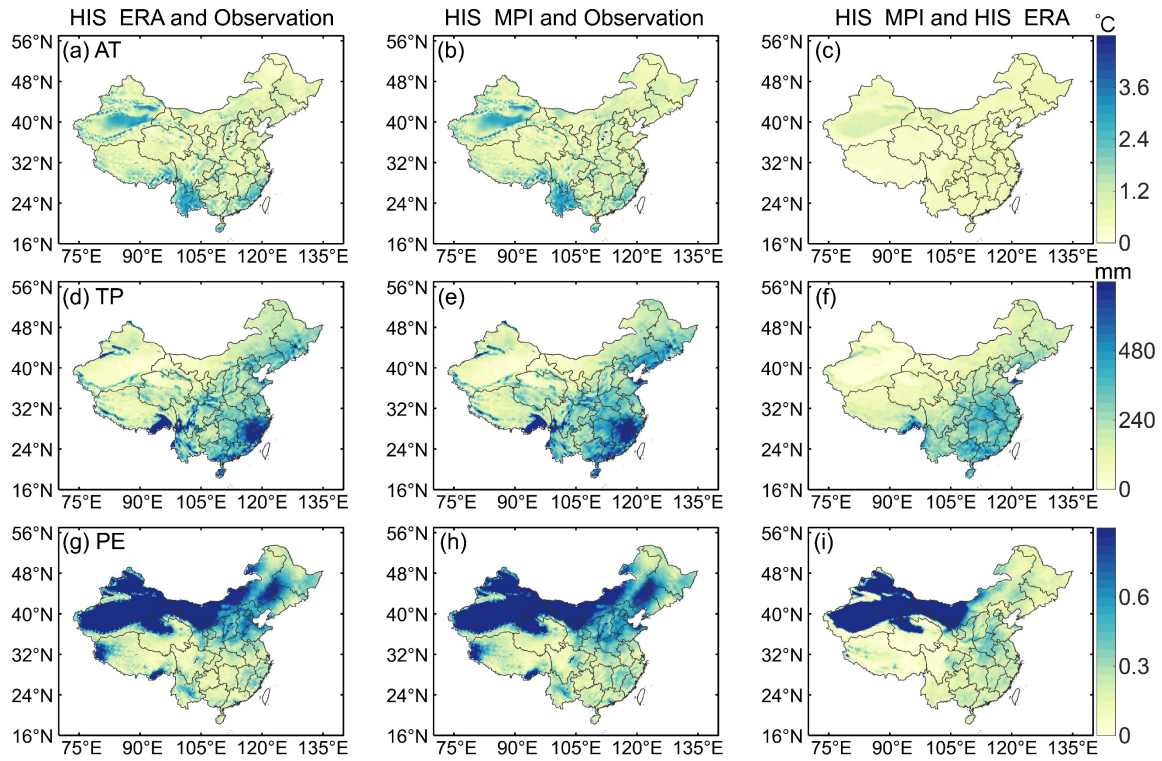

**Figure S6:** Comparison of observation, HIS\_ERA and HIS\_MPI based on RMSE. HIS\_ERA and HIS\_MPI indicate the WRF simulation driven by ERA5 reanalysis data and bias-corrected MPI-ESM1-2-HR model, respectively. The observation derives from the CN05.1 dataset.

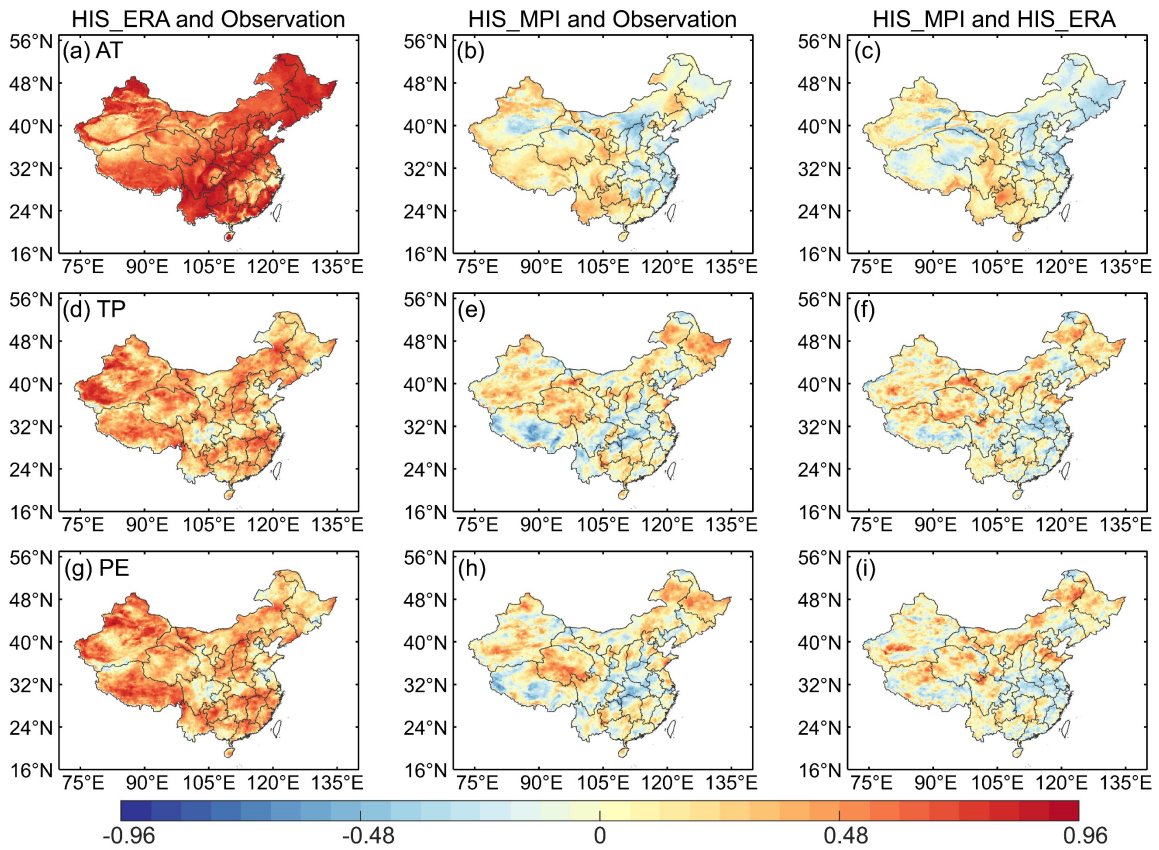

**Figure S7:** Comparison of observation, HIS\_ERA and HIS\_MPI based on spatial correlation coefficient. HIS\_ERA and HIS\_MPI indicate the WRF simulation driven by ERA5 reanalysis data and bias-corrected MPI-ESM1-2-HR model, respectively. The observation derives from the CN05.1 dataset

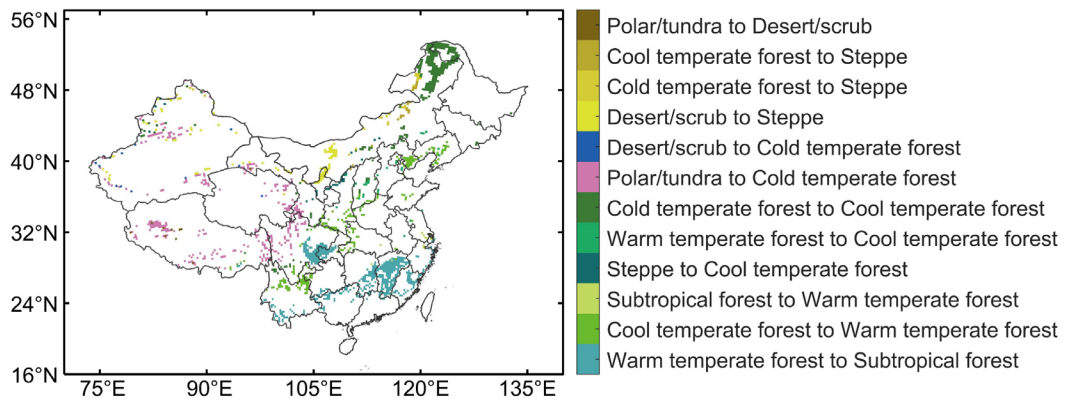

**Figure S8:** Projected changes (FUT\_ MPI versus HIS\_ MPI) in major vegetation types under SSP2-4.5 comparing to 1995–2014. The shifted total areas of vegetation types exceeding 6250 m<sup>2</sup> (10 grids) are exhibited.

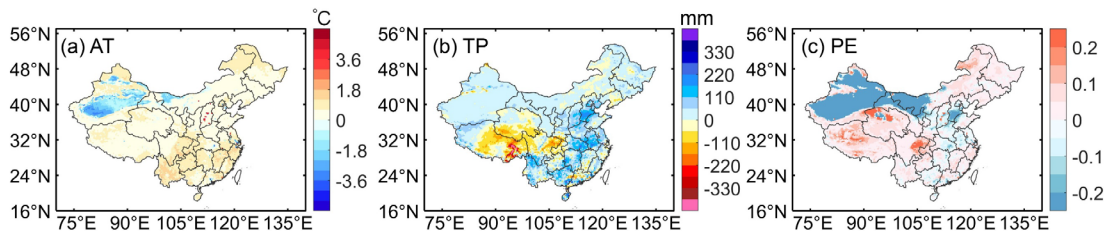

**Figure S9:** Projected changes (FUT\_ MPI versus HIS\_ MPI) in key climate variables (AT, TP, and PE) under SSP2-4.5 comparing to 1995–2014.

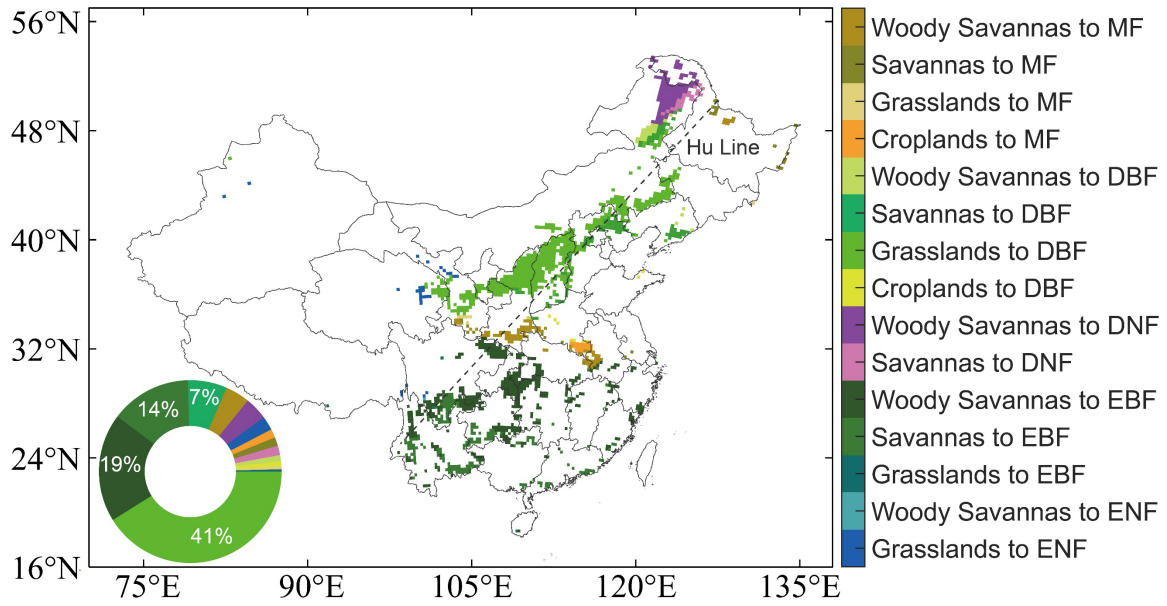

**Figure S10:** Same as Fig. 7 but for the index that areas with high total annual precipitation is given priority for afforestation.

**Table S1:** The IGBP classification scheme of MCD12Q1 products

| Name                                | Value | Description                                                                                            |
|-------------------------------------|-------|--------------------------------------------------------------------------------------------------------|
| Evergreen Needleleaf Forests        | 1     | Dominated by evergreen conifer trees (canopy >2m). Tree cover >60%.                                    |
| Evergreen Broadleaf Forests         | 2     | Dominated by evergreen broadleaf and palmate trees (canopy >2m). Tree cover >60%.                      |
| Deciduous Needleleaf Forests        | 3     | Dominated by deciduous needleleaf (larch) trees (canopy >2m). Tree cover >60%.                         |
| Deciduous Broadleaf Forests         | 4     | Dominated by deciduous broadleaf trees (canopy >2m). Tree cover >60%.                                  |
| Mixed Forests                       | 5     | Dominated by neither deciduous nor evergreen (40-60% of each) tree type (canopy >2m). Tree cover >60%. |
| Closed Shrublands                   | 6     | Dominated by woody perennials (1-2m height) >60% cover.                                                |
| Open Shrublands                     | 7     | Dominated by woody perennials (1-2m height) 10-60% cover.                                              |
| Woody Savannas                      | 8     | Tree cover 30-60% (canopy >2m).                                                                        |
| Savannas                            | 9     | Tree cover 10-30% (canopy >2m).                                                                        |
| Grasslands                          | 10    | Dominated by herbaceous annuals (<2m).                                                                 |
| Permanent Wetlands                  | 11    | Permanently inundated lands with 30-60% water cover and >10% vegetated cover.                          |
| Croplands                           | 12    | At least 60% of area is cultivated cropland.                                                           |
| Urban and Built-up Lands            | 13    | At least 30% impervious surface area including building materials, asphalt, and vehicles.              |
| Cropland/Natural Vegetation Mosaics | 14    | Mosaics of small-scale cultivation 40-60% with natural tree, shrub, or herbaceous vegetation.          |
| Permanent Snow and Ice              | 15    | At least 60% of area is covered by snow and ice for at least 10 months of the year.                    |
| Barren                              | 16    | At least 60% of area is non-vegetated barren (sand, rock, soil) areas with less than 10% vegetation.   |
| Water Bodies                        | 17    | At least 60% of area is covered by permanent water bodies.                                             |
| Unclassified                        | 255   | Has not received a map label because of missing inputs.                                                |



**Table S2:** Area of afforestation region of each province in China (unit: 10<sup>4</sup> km<sup>2</sup>)

| Provinces      | Historical open area regions | Projected forest suitable lands | Projected potential afforestation regions constrained by climate change | National planed afforestation (NFMP) | Final future potential afforestation region constrained by climate change and national policy |
|----------------|------------------------------|---------------------------------|-------------------------------------------------------------------------|--------------------------------------|-----------------------------------------------------------------------------------------------|
| Inner Mongolia | 94.68                        | 45.18                           | 38.62                                                                   | 12.23                                | 12.26                                                                                         |
| Shanxi         | 9.00                         | 14.69                           | 9.00                                                                    | 8.99                                 | 9.00                                                                                          |
| Shaanxi        | 8.45                         | 17.58                           | 7.58                                                                    | 7.20                                 | 7.19                                                                                          |
| Yunnan         | 21.37                        | 30.07                           | 20.38                                                                   | 6.91                                 | 6.91                                                                                          |
| Gansu          | 31.23                        | 13.50                           | 6.75                                                                    | 5.87                                 | 5.89                                                                                          |
| Sichuan        | 27.06                        | 22.41                           | 8.47                                                                    | 5.66                                 | 5.64                                                                                          |
| Hebei          | 7.70                         | 16.76                           | 7.70                                                                    | 4.17                                 | 4.18                                                                                          |
| Guizhou        | 9.68                         | 12.93                           | 9.68                                                                    | 3.46                                 | 3.46                                                                                          |
| Henan          | 0.71                         | 15.89                           | 0.71                                                                    | 2.34                                 | 2.33                                                                                          |
| Qinghai        | 67.94                        | 3.13                            | 2.88                                                                    | 2.30                                 | 2.31                                                                                          |
| Hunan          | 10.48                        | 16.23                           | 10.48                                                                   | 1.91                                 | 1.91                                                                                          |
| Hubei          | 6.03                         | 14.40                           | 6.03                                                                    | 1.64                                 | 1.66                                                                                          |
| Chongqing      | 2.38                         | 6.63                            | 2.38                                                                    | 1.37                                 | 1.38                                                                                          |
| Heilongjiang   | 6.37                         | 38.17                           | 6.37                                                                    | 1.25                                 | 1.26                                                                                          |
| Liaoning       | 3.24                         | 12.80                           | 3.24                                                                    | 1.11                                 | 1.12                                                                                          |
| Guangxi        | 12.44                        | 19.15                           | 12.44                                                                   | 1.11                                 | 1.12                                                                                          |
| Guangdong      | 8.39                         | 15.39                           | 8.39                                                                    | 1.08                                 | 1.09                                                                                          |
| Anhui          | 2.28                         | 12.65                           | 2.28                                                                    | 0.75                                 | 0.76                                                                                          |
| Jiangxi        | 8.09                         | 13.84                           | 8.09                                                                    | 0.72                                 | 0.70                                                                                          |
| Ningxia        | 3.75                         | 1.38                            | 0.69                                                                    | 0.70                                 | 0.69                                                                                          |
| Tibet          | 110.50                       | 4.63                            | 0.31                                                                    | 0.61                                 | 0.25                                                                                          |
| Fujian         | 3.63                         | 9.19                            | 3.63                                                                    | 0.59                                 | 0.60                                                                                          |
| Jilin          | 1.75                         | 17.31                           | 1.75                                                                    | 0.53                                 | 0.56                                                                                          |
| Zhejiang       | 4.68                         | 6.89                            | 4.68                                                                    | 0.46                                 | 0.46                                                                                          |
| Beijing        | 0.54                         | 1.54                            | 0.54                                                                    | 0.31                                 | 0.33                                                                                          |
| Xinjiang       | 147.81                       | 5.81                            | 5.56                                                                    | 0.21                                 | 0.19                                                                                          |
| Shandong       | 0.06                         | 14.19                           | 0.06                                                                    | 0.11                                 | 0.13                                                                                          |
| Jiangsu        | 0.66                         | 9.41                            | 0.66                                                                    | 0.09                                 | 0.10                                                                                          |
| Hainan         | 1.88                         | 2.69                            | 1.88                                                                    | 0.07                                 | 0.07                                                                                          |
| Tianjin        | 0.06                         | 1.19                            | 0.06                                                                    | 0.03                                 | 0.06                                                                                          |
| Shanghai       | 0.05                         | 0.44                            | 0.05                                                                    | 0.00                                 | 0.05                                                                                          |
| Hong Kong      | 0.00                         | 0.00                            | 0.00                                                                    | 0.00                                 | 0.00                                                                                          |
| Macau          | 0.00                         | 0.00                            | 0.00                                                                    | 0.00                                 | 0.00                                                                                          |
| Taiwan         | 0.00                         | 0.00                            | 0.00                                                                    | 0.00                                 | 0.00                                                                                          |
| Total          | 612.88                       | 416.08                          | 191.33                                                                  | 73.78                                | 73.64                                                                                         |

**Table S3:** The classification scheme of HLZ model in this study

|    | Potential vegetation types   | Reclassifications     | AT (°C) | TP(mm)  | PE   |
|----|------------------------------|-----------------------|---------|---------|------|
| 1  | Polar/Nival area             |                       | 1.1     | 353.6   | 0.2  |
| 2  | Subpolar/Alpine dry tundra   |                       | 2.1     | 88.4    | 1.4  |
| 3  | Subpolar/Alpine moist tundra | Polar/tundra          | 2.1     | 177.8   | 0.7  |
| 4  | Subpolar/Alpine wet tundra   |                       | 2.1     | 353.6   | 0.4  |
| 5  | Subpolar/Alpine rain tundra  |                       | 2.1     | 707.1   | 0.2  |
| 6  | Cold temperate dry scrub     |                       | 4.2     | 177.8   | 1.4  |
| 7  | Cool temperate desert scrub  |                       | 8.5     | 177.8   | 2.8  |
| 8  | Warm temperate desert scrub  | Desert/scrub          | 14.3    | 177.8   | 5.7  |
| 9  | Subtropical desert scrub     |                       | 20.2    | 177.8   | 5.7  |
| 10 | Tropical desert scrub        |                       | 33.9    | 177.8   | 11.3 |
| 11 | Desert                       |                       | 33.9    | 88.4    | 22.6 |
| 12 | Cool temperate steppe        | Steppe                | 8.5     | 353.6   | 1.4  |
| 13 | Warm temperate thorn steppe  |                       | 14.3    | 353.6   | 2.8  |
| 14 | Cold temperate moist forest  |                       | 4.2     | 353.6   | 0.7  |
| 15 | Cold temperate wet forest    | Cold temperate forest | 4.2     | 707.2   | 0.4  |
| 16 | Cold temperate rain forest   |                       | 4.2     | 1414.2  | 0.2  |
| 17 | Cool temperate moist forest  |                       | 8.5     | 707.1   | 0.7  |
| 18 | Cool temperate wet forest    | Cool temperate forest | 8.5     | 1414.2  | 0.4  |
| 19 | Cool temperate rain forest   |                       | 8.5     | 2828.4  | 0.2  |
| 20 | Warm temperate dry forest    |                       | 14.3    | 707.1   | 1.4  |
| 21 | Warm temperate moist forest  | Warm temperate forest | 14.3    | 1414.2  | 0.7  |
| 22 | Warm temperate wet forest    |                       | 14.3    | 2828.4  | 0.4  |
| 23 | Subtropical thorn woodland   |                       | 20.2    | 353.6   | 2.8  |
| 24 | Subtropical dry forest       |                       | 20.2    | 707.1   | 1.4  |
| 25 | Subtropical moist forest     | Subtropical forest    | 20.2    | 1414.2  | 0.7  |
| 26 | Subtropical wet forest       |                       | 20.2    | 2828.4  | 0.4  |
| 27 | Subtropical rain forest      |                       | 20.2    | 5656.9  | 0.2  |
| 28 | Tropical thorn woodland      |                       | 33.9    | 353.6   | 5.7  |
| 29 | Tropical very dry forest     |                       | 33.9    | 707.1   | 2.8  |
| 30 | Tropical dry forest          | Tropical forest       | 33.9    | 1414.2  | 1.4  |
| 31 | Tropical moist forest        |                       | 33.9    | 2828.4  | 0.7  |
| 32 | Tropical wet forest          |                       | 33.9    | 5656.9  | 0.4  |
| 33 | Tropical rain forest         |                       | 33.9    | 11313.7 | 0.2  |

## References

Liu, J., Kuang, W., Zhang, Z., Xu, X., Qin, Y., Ning, J., Zhou, W., Zhang, S., Li, R., Yan, C., Wu, S., Shi, X., Jiang, N., Yu, D., Pan, X., and Chi, W.: Spatiotemporal characteristics, patterns, and causes of land-use changes in China since the late 1980s, *J. Geogr. Sci.*, 24, 195-210, doi:10.1007/s11442-014-1082-6, 2014.
